# Supplementary material
Source: HighWire-hosted journal article supplement (https://www.jpn.ca/highwire/filestream/89600/field_highwire_adjunct_files/0/jpn-150223-1-at.pdf)
Supplement: jpn-150223-1-at.pdf [file jpn-150223-1-at.pdf]

**Appendix 1** to Dubin MJ, Mao X, Banerjee S, et al. Elevated prefrontal cortex GABA in patients with major depressive disorder after TMS treatment measured with proton magnetic resonance spectroscopy. *J Psychiatry Neurosci* 2016.

DOI: 10.1503/jpn.150223

Copyright © 2016 The Author(s) or their employer(s). To receive this resource in an accessible format, please contact us at [cmajgroup@cmaj.ca](mailto:cmajgroup@cmaj.ca).

*Online appendices are unedited and posted as supplied by the authors.*

| Subject | Age | Gender | Axis I                   | Current Medications                                                                                                  | Medication Trials: Lifetime (Current Episode) |                 |               |
|---------|-----|--------|--------------------------|----------------------------------------------------------------------------------------------------------------------|-----------------------------------------------|-----------------|---------------|
|         |     |        |                          |                                                                                                                      | Antidepressant                                | Mood Stabilizer | Antipsychotic |
| 1       | 41  | F      | MDD                      | Dextroamphetamine 15mg<br>Zolpidem 10mg                                                                              | 7 (6)                                         | 0               | 5 (5)         |
| 2       | 67  | F      | MDD                      | Methylphenidate 20mg                                                                                                 | 2 (2)                                         | 1 (1)           | 1 (1)         |
| 3       | 41  | F      | Bipolar II,<br>Depressed | Fluvoxamine 400mg<br>Topiramate 100mg<br>Quetiapine 200mg<br>Ziprasidone 160mg<br>Perphenazine 32mg<br>Lorazepam 2mg | 4 (4)                                         | 1 (1)           | 4 (4)         |
| 4       | 53  | F      | MDD                      | Duloxetine 60mg<br>Bupropion 150mg                                                                                   | 5 (2)                                         | 0               | 0             |
| 5       | 26  | M      | MDD, OCD                 | Fluoxetine 60mg<br>Bupropion 450mg<br>Topiramate 100mg                                                               | 2 (2)                                         | 1 (1)           | 0             |
| 6       | 68  | F      | MDD                      | Venlafaxine 300mg<br>Citalopram 40mg<br>Clomipramine 50mg<br>Gabapentin 2400mg<br>Clonazepam 0.5mg                   | 3 (3)                                         | 1 (1)           | 0             |
| 7       | 40  | M      | MDD                      | Venlafaxine 75mg<br>Bupropion 100mg<br>Lorazepam 1mg                                                                 | 3 (3)                                         | 0               | 0             |
| 8       | 27  | F      | MDD                      | None                                                                                                                 | 5 (2)                                         | 0               | 0             |
| 9       | 56  | F      | MDD                      | None                                                                                                                 | 2 (2)                                         | 1 (1)           | 1 (1)         |

**Appendix 1** to Dubin MJ, Mao X, Banerjee S, et al. Elevated prefrontal cortex GABA in patients with major depressive disorder after TMS treatment measured with proton magnetic resonance spectroscopy. *J Psychiatry Neurosci* 2016.

DOI: 10.1503/jpn.150223

*Online appendices are unedited and posted as supplied by the authors.*

| Subject | Age | Gender | Axis I               | Current Medications                                                                           | Medication Trials: Lifetime (Current Episode) |                 |               |
|---------|-----|--------|----------------------|-----------------------------------------------------------------------------------------------|-----------------------------------------------|-----------------|---------------|
|         |     |        |                      |                                                                                               | Antidepressant                                | Mood Stabilizer | Antipsychotic |
| 10      | 22  | F      | MDD                  | Sertraline 200mg                                                                              | 6 (2)                                         | 1 (0)           | 1 (0)         |
| 11      | 24  | F      | MDD, OCD             | Sertraline 200mg<br>Bupropion 150mg                                                           | 5 (5)                                         | 0               | 2 (2)         |
| 12      | 21  | F      | BAD II,<br>Depressed | Lithium 900mg<br>Lamotrigine 200mg<br>Aripiprazole 5mg<br>Pramipexole 6mg<br>Pregabalin 450mg | 0 (0)                                         | 4 (3)           | 2 (1)         |
| 13      | 60  | F      | MDD                  | Tranylcypromine 40mg<br>Dextroamphetamine 5mg<br>Clonazepam 0.5mg                             | 7 (6)                                         | 0               | 1 (1)         |
| 14      | 32  | M      | MDD                  | Fluoxetine 20mg<br>Lamotrigine 50mg<br>Clonazepam 0.5mg (1/wk)                                | 6 (3)                                         | 1 (1)           | 2 (2)         |
| 15      | 27  | F      | MDD                  | None                                                                                          | 2 (2)                                         | 0               | 2 (2)         |
| 16      | 28  | M      | MDD                  | Venlafaxine 150mg<br>Clonazepam 1mg (1/wk)<br>Amphetamine 10mg (1/wk)                         | 8 (3)                                         | 2 (0)           | 1 (0)         |
| 17      | 29  | M      | MDD, ADHD            | Bupropion 150mg<br>Amphetamine 30mg                                                           | 4 (4)                                         | 0               | 1 (1)         |
| 18      | 62  | F      | MDD, GAD             | Aripiprazole 2mg<br>Lorazepam 1mg                                                             | 7 (7)                                         | 0               | 4 (4)         |

**Appendix 1** to Dubin MJ, Mao X, Banerjee S, et al. Elevated prefrontal cortex GABA in patients with major depressive disorder after TMS treatment measured with proton magnetic resonance spectroscopy. *J Psychiatry Neurosci* 2016.

DOI: 10.1503/jpn.150223

*Online appendices are unedited and posted as supplied by the authors.*

| Subject | Age | Gender | Axis I | Current Medications                                                  | Medication Trials: Lifetime (Current Episode) |                 |               |
|---------|-----|--------|--------|----------------------------------------------------------------------|-----------------------------------------------|-----------------|---------------|
|         |     |        |        |                                                                      | Antidepressant                                | Mood Stabilizer | Antipsychotic |
| 19      | 63  | M      | MDD    | Isocarboxazid 40mg<br>Asenapine 5mg<br>Lorazepam 2mg<br>Zolpidem 5mg | 5 (4)                                         | 1 (0)           | 3 (3)         |
| 20      | 25  | F      | MDD    | Lamotrigine 50mg<br>Amphetamine 50mg                                 | 4 (4)                                         | 2 (2)           | 1 (1)         |
| 21      | 42  | F      | MDD    | None                                                                 | 3 (1)                                         | 3 (1)           | 0             |
| 22      | 55  | M      | MDD    | Duloxetine 60mg<br>Aripiprazole 10mg<br>Amphetamine 30mg             | 3 (2)                                         | 1 (0)           | 1 (1)         |
| 23      | 49  | F      | MDD    | Fluoxetine 80mg<br>Trazadone 50mg<br>Clonazepam 1mg                  | 5 (5)                                         | 1 (1)           | 3 (3)         |

**Supplementary Table 1:** Age, gender, axis I DSM-IV diagnosis, current medications (total daily dose in milligrams), number of lifetime and current episode trials of adequate dose and duration for antidepressant, mood stabilizer and antipsychotic medication classes.

**Appendix 1** to Dubin MJ, Mao X, Banerjee S, et al. Elevated prefrontal cortex GABA in patients with major depressive disorder after TMS treatment measured with proton magnetic resonance spectroscopy. *J Psychiatry Neurosci* 2016.

DOI: 10.1503/jpn.150223

*Online appendices are unedited and posted as supplied by the authors.*

| Subject | %MT | HAMD-24  |         |
|---------|-----|----------|---------|
|         |     | Baseline | %Change |
| 1       | 50  | 31       | -19%    |
| 2       | 100 | 22       | -59%    |
| 3       | 81  | 36       | -28%    |
| 4       | 85  | 27       | -44%    |
| 5       | 95  | 24       | -13%    |
| 6       | 86  | 18       | +6%     |
| 7       | 107 | 28       | -29%    |
| 8       | 83  | 25       | -84%    |
| 9       | 50  | 25       | -88%    |
| 10      | 98  | 37       | -54%    |
| 11      | 85  | 24       | -29%    |
| 12      | 109 | 26       | 0%      |
| 13      | 80  | 33       | -33%    |
| 14      | 85  | 27       | -15%    |
| 15      | 82  | 25       | -32%    |
| 16      | 92  | 30       | -57%    |
| 17      | 85  | 22       | -55%    |
| 18      | 80  | 39       | -31%    |
| 19      | 83  | 30       | -23%    |
| 20      | 82  | 37       | -59%    |
| 21      | 93  | 27       | -52%    |
| 22      | 100 | 33       | -9%     |
| 23      | 103 | 35       | +6%     |

**Supplementary Table 2:** Average stimulation intensity (percent resting motor threshold; %MT) over the left dorsolateral prefrontal cortex during the 5 week course of TMS. Baseline and %Change in HAMD-24 score during the 5 week course of TMS.

**Appendix 1** to Dubin MJ, Mao X, Banerjee S, et al. Elevated prefrontal cortex GABA in patients with major depressive disorder after TMS treatment measured with proton magnetic resonance spectroscopy. *J Psychiatry Neurosci* 2016.

DOI: 10.1503/jpn.150223

*Online appendices are unedited and posted as supplied by the authors.*

#### MRS Data Acquisition with the Standard J-editing Sequence

To derive the levels of GABA and Glx with the J-editing technique, a pair of frequency-selective inversion pulses is inserted into the standard PRESS method and applied at the frequency of the GABA C-3 peak at 1.9 ppm on alternate scans (Figure 1C, parts a and b), with TR/TE 1500/68 ms. This results in two subspectra in which the outer lines of the C-4 GABA multiplet resonance at 3.0 ppm are alternatively inverted or not inverted. Subtracting these subspectra yields the GABA difference spectrum, consisting of the GABA C-4 at 3.0 ppm, while the much stronger overlapping total creatine (tCr) resonance is eliminated (Figure 1C, part c). While the J-editing sequence is optimized for GABA detection, it also achieves detection of the Glx resonance at 3.7 ppm (Figure 1C, part c), although with reduced efficiency.

**Appendix 1** to Dubin MJ, Mao X, Banerjee S, et al. Elevated prefrontal cortex GABA in patients with major depressive disorder after TMS treatment measured with proton magnetic resonance spectroscopy. *J Psychiatry Neurosci* 2016.

DOI: 10.1503/jpn.150223

*Online appendices are unedited and posted as supplied by the authors.*

#### MRS Data Quality Assessment Criteria and Procedures

In this study, spectral quality assessment, which determined whether the results of individual MRS data sets were ultimately included in and rejected from group analyses, was established using a number of criteria along the spectral data acquisition and processing pipeline. As can be appreciated by examining the sample spectrum presented in Fig. 1C, which is typical of all successful acquisitions, we achieved relatively high spectral quality and signal-to-noise ratios. Therefore, no spectra were rejected strictly due poor quality or SNR. Rather, spectra were rejected because either (a) the shim quality was poor (defined as a full-width at half maximum of the water resonance of more than 20 Hz, and/or spectra with unresolved total creatine and total choline resonances at 3.03 and 3.22 ppm), and (b) there was excessive head motion during a scan. Our criteria for detecting and rejecting motion-degraded spectra were: (1) a very large residual water resonance in the difference or edited spectra due to poor cancelation upon subtracting two subspectra in which the water signal was differentially affected by the head motion; (2) peak phase distortions in all the spectra that could not be automatically adjusted using the phases derived from the

**Appendix 1** to Dubin MJ, Mao X, Banerjee S, et al. Elevated prefrontal cortex GABA in patients with major depressive disorder after TMS treatment measured with proton magnetic resonance spectroscopy. *J Psychiatry Neurosci* 2016.

DOI: 10.1503/jpn.150223

*Online appendices are unedited and posted as supplied by the authors.*

unsuppressed voxel water resonance, and (3) degraded SNR in the edited spectra due to incoherent summing of subspectra with motion-induced peak phase and position shifts. All the spectra that met those initial quality assessment criteria were processed as illustrated in Figure 1C (traces [a-f]) to obtain the area under the GABA and Glx peaks, which are proportional to the concentration of each neurotransmitter in the voxel of interest. Briefly, the GABA and Glx resonances in the J-edited difference spectra were modeled as a linear combination pseudo-Voigt lineshape functions and then fitted in the frequency domain using a robust and highly optimized public-domain Levenberg-Marquardt nonlinear least-squares minimization routine, MPFIT (1) (The IDL fitting routine, 'MPFIT', is available at <http://purl.com/net/mpfit>; Last Modified on 2013-08-14 10:55:25 by Craig Markwardt). The pseudo-Voigt lineshape function enables more precise analysis of lineshapes that consist of mixtures of Lorentzian and Gaussian functions (2), as is often the case for *in vivo* spectra.

At convergence, MPFIT, like all nonlinear least-squares estimation procedures, reports the minimized sum of squared residuals or  $\chi^2$  as the "goodness of fit" (3). A fit is considered

**Appendix 1** to Dubin MJ, Mao X, Banerjee S, et al. Elevated prefrontal cortex GABA in patients with major depressive disorder after TMS treatment measured with proton magnetic resonance spectroscopy. *J Psychiatry Neurosci* 2016.

DOI: 10.1503/jpn.150223

*Online appendices are unedited and posted as supplied by the authors.*

acceptable if at convergence,  $\chi^2$  is approximately equal number of degrees of freedom -- defined as the difference between the number of spectral data points (N) and the number of estimated parameters (M) -- or if  $\chi^2 / (N-M)$ , known as reduced  $\chi^2$ , is approximately equal to 1. Deviations from these limits generally indicate an incorrect fitting model or failed fit. Due to the relative simplicity and high SNR and quality of the spectra in this study, excellent "good of fit" based on both  $\chi^2$  and visual inspection was consistently obtained, so that no spectra that survived our initial quality assessment criteria were rejected due to poor fit.



**Appendix 1** to Dubin MJ, Mao X, Banerjee S, et al. Elevated prefrontal cortex GABA in patients with major depressive disorder after TMS treatment measured with proton magnetic resonance spectroscopy. *J Psychiatry Neurosci* 2016.

DOI: 10.1503/jpn.150223

*Online appendices are unedited and posted as supplied by the authors.*

#### REFERENCES

1. Markwardt CB. Non-linear Least-squares Fitting in IDL with MPFIT. Proceedings of Astronomical Data Analysis Software and Systems XVIII 2008; San Francisco, CA: Astronomical Society of the Pacific 2009; 411:251-254. The IDL fitting routine, 'MPFIT', is available at <http://purl.com/net/mpfit>; Last Modified on 2013-08-14 10:55:25 by Craig Markwardt.
2. Marshall I, Bruce SD, Higinbotham J, MacLulich A, Wardlaw JM, Ferguson KJ, Seckl J: Choice of spectroscopic lineshape model affects metabolite peak areas and area ratios. *Magn Reson Med* 2000; 44(4):646-649.
3. Bevington PR, Robinson DK. Data reduction and error analysis for the physical sciences. 3rd Edition ed. Boston: McGraw-Hill, 2003.
